# Supplementary material
Source: Elsevier journal article supplement (https://www.sciencedirect.com/science/article/pii/S0034745021000846)
Supplement: mmc1 [file S0034745021000846:mmc1.pdf]

**Table 1 of the supplementary material – Comparison between health-related vs. non-health-related students with significative depression symptomatology staging through PHQ-9**

|                                                                        | Health-related students<br>(n=296) | Non healt-related students<br>(n=245) | <i>P</i> value     |
|------------------------------------------------------------------------|------------------------------------|---------------------------------------|--------------------|
| <i>Age (years)</i>                                                     | 20 [19-22]                         | 20 [18-21]                            | .129               |
| <i>Male gender</i>                                                     | 67 (27.34)                         | 100 (33.78)                           | .107               |
| <i>Has been informed</i>                                               | 190 (77.55)                        | 223 (75.33)                           | .547               |
| <i>Believes in what they are told</i>                                  | 165 (67.34)                        | 176 (59.45)                           | <sup>a</sup> .059  |
| <i>Has sought information</i>                                          | 222 (90.61)                        | 239 (80.74)                           | <sup>b</sup> <.001 |
| <i>Knows the correct symptoms</i>                                      | 232 (94.69)                        | 286 (96.62)                           | .269               |
| <i>Someone close to them has had symptoms suggestive of SARS-CoV-2</i> | 105 (42.85)                        | 107 (36.14)                           | .126               |
| <i>Knows people or relatives who do not believe in the disease</i>     | 206 (84.01)                        | 229 (77.36)                           | <sup>b</sup> .05   |
| <i>Will get vaccinated</i>                                             | 232 (94.69)                        | 270 (91.21)                           | .12                |
| <i>Believes that vaccination must be obligatory</i>                    | 211 (86.11)                        | 231 (78.04)                           | <sup>b</sup> .025  |
| <i>Has sought alternative medicine</i>                                 | 16 (6.53)                          | 36 (12.16)                            | <sup>b</sup> .004  |
| <i>Knows a medical health provider that has been discriminated</i>     | 155 (63.26)                        | 137 (46.28)                           | <sup>b</sup> <.001 |
| <i>Has complied with quarantine guidelines</i>                         | 148 (60.4)                         | 159 (53.71)                           | .118               |
| <i>Considers quarantine necessary</i>                                  | 225 (91.83)                        | 249 (84.12)                           | <sup>b</sup> .017  |
| <i>Their family has complied with quarantine guidelines</i>            | 100 (40.81)                        | 122 (41.21)                           | <sup>b</sup> .048  |
| <i>When do you consider prompt to return to normality?</i>             |                                    |                                       |                    |

|                                                                       |             |             |                    |
|-----------------------------------------------------------------------|-------------|-------------|--------------------|
| Right now                                                             | 8 (3.26)    | 7 (2.36)    | .081               |
| During the beginning of June                                          | 15 (6.12)   | 38 (12.83)  |                    |
| August                                                                | 72 (29.38)  | 93 (31.41)  |                    |
| Before 2021                                                           | 91 (37.14)  | 93 (31.41)  |                    |
| Next year                                                             | 59 (24.08)  | 65 (21.95)  |                    |
| <i>Do you think quarantine has affected you in any way?</i>           |             |             |                    |
| Minimum                                                               | 7 (2.85)    | 14 (4.72)   | <sup>b</sup> <.001 |
| Mild                                                                  | 39 (15.91)  | 92 (31.08)  |                    |
| Moderate                                                              | 95 (38.77)  | 127 (41.9)  |                    |
| A lot                                                                 | 57 (23.26)  | 0 (0)       |                    |
| Exaggerated                                                           | 47 (19.18)  | 63 (21.28)  |                    |
| <i>Do you think quarantine has affected your family?</i>              |             |             | .797               |
| Yes, all of them                                                      | 100 (40.81) | 158 (53.37) |                    |
| No                                                                    | 17 (6.93)   | 24 (8.1)    |                    |
| Some of them                                                          | 100 (40.81) | 114 (38.51) |                    |
| <i>Quarantine triggered intrafamilial violence</i>                    |             |             | <sup>b</sup> <.001 |
| Yes                                                                   | 48 (19.59)  | 71 (23.98)  |                    |
| No                                                                    | 157 (64.08) | 225 (76.01) |                    |
| Partially                                                             | 40 (16.32)  | 0 (0)       |                    |
| <i>Who is the violent one in the family?</i>                          |             |             |                    |
| Father                                                                | 41 (16.73)  | 34 (11.48)  | <sup>b</sup> .02   |
| Mother                                                                | 38 (15.51)  | 27 (9.12)   | .535               |
| Brother                                                               | 28 (11.42)  | 19 (6.41)   | .51                |
| Themselves                                                            | 21 (8.57)   | 15 (5.06)   | .704               |
| Other                                                                 | 25 (10.2)   | 13 (4.39)   | <sup>b</sup> .006  |
| <i>To what degree do you think quarantine increases your anxiety?</i> |             |             |                    |

|                                                                                              |             |             |                    |
|----------------------------------------------------------------------------------------------|-------------|-------------|--------------------|
| Minimum                                                                                      | 24 (9.79)   | 28 (9.45)   | .859               |
| Mild                                                                                         | 34 (13.87)  | 34 (11.48)  |                    |
| Moderate                                                                                     | 64 (26.12)  | 85 (28.71)  |                    |
| A lot                                                                                        | 72 (29.38)  | 90 (30.4)   |                    |
| Exaggerated                                                                                  | 51 (20.81)  | 55 (18.58)  |                    |
| <i>Previously diagnosed psychiatric disorder</i>                                             | 92 (37.55)  | 93 (31.41)  | .134               |
| Depression                                                                                   | 57 (23.26)  | 51 (17.22)  | .095               |
| Anxiety                                                                                      | 66 (26.93)  | 65 (21.95)  | .369               |
| Bipolar disorder                                                                             | 4 (1.63)    | 1 (0.33)    | .177               |
| Other                                                                                        | 20          | 25          | .894               |
| <i>Has the previous psychiatric diagnosis worsened?</i>                                      | 137 (55.91) | 199 (67.22) | <sup>b</sup> <.001 |
| <i>Residence area</i>                                                                        |             |             | 1.0                |
| Urban                                                                                        | 216 (88.44) | 261 (88.17) |                    |
| Urban/rural                                                                                  | 26 (10.61)  | 32 (10.81)  |                    |
| Rural                                                                                        | 3 (1.22)    | 3 (1.01)    |                    |
| <i>Currently living with their parents</i>                                                   | 202 (82.44) | 156 (52.1)  | <sup>b</sup> <.001 |
| <i>Considers that the economic income is enough</i>                                          | 148 (60.4)  | 172 (58.1)  | .588               |
| <i>Refers to belonging to a risk group</i>                                                   | 27 (11.02)  | 53 (17.9)   | .962               |
| <i>Feels that belonging to a risk group, makes vulnerable your situation in crisis times</i> | 29 (11.83)  | 28 (9.45)   | <sup>b</sup> .045  |
| <i>Has tried drugs to deal with quarantine</i>                                               | 26 (10.61)  | 28 (9.45)   | .656               |
| <i>Which drugs have they taken?</i>                                                          |             |             | <sup>b</sup> .001  |
| Cocaine                                                                                      | 1 (0.4)     | 1(0.33)     |                    |
| Marihuana                                                                                    | 15 (6.12)   | 24 (8.1)    |                    |
| LSD                                                                                          | 1 (0.4)     | 1 (0.33)    |                    |
| Crack                                                                                        | 1 (0.4)     | 1 (0.33)    |                    |

|                                        |             |             |                    |
|----------------------------------------|-------------|-------------|--------------------|
| Opiates                                | 1 (0.4)     | 7 (2.36)    |                    |
| Other                                  | 12 (4.89)   | 1 (0.33)    |                    |
| <i>How often?</i>                      |             |             | .753               |
| 1-2 times a week                       | 3 (1.22)    | 7 (2.36)    |                    |
| 3-4 times a week                       | 3 (1.22)    | 4 (1.35)    |                    |
| 5-7 times a week                       | 2 (0.81)    | 2 (0.67)    |                    |
| Once                                   | 17 (6.93)   | 18 (6.08)   |                    |
| <i>Would you like to receive help?</i> | 198 (80.81) | 207 (69.93) | <sup>b</sup> .002  |
| <i>Suicidal thoughts</i>               | 94 (38.36)  | 118 (39.86) | <sup>b</sup> <.001 |
| <i>Significative GAD-7 score</i>       | 124 (50.61) | 149 (50.33) | .949               |

GAD-7: General Anxiety Disorder-7; PHQ-9: Patient Health Questionnaire-9.

<sup>a</sup>Borderline *P*-value.

<sup>b</sup>*P*-value with statistical significance.

The non-parametric quantitative variables were addressed with the Mann-Whitney U statistical test, and the qualitative variables were addressed using the  $\chi^2$  test or Fisher's exact test.

**Table 2 of the supplementary material – Comparison between health-related vs. non-health-related students with significative anxiety symptomatology staging through GAD-7**

|                                                                        | Health-related students (n=141) | Non health-related students (n=170) | <i>P</i> -value |
|------------------------------------------------------------------------|---------------------------------|-------------------------------------|-----------------|
| <i>Age (years)</i>                                                     | 20 [19-22]                      | 19.5 [18-21]                        | *.027           |
| <i>Male</i>                                                            | 28 (19.85)                      | 46 (27.05)                          | .138            |
| <i>Has been informed</i>                                               | 115 (81.56)                     | 132 (77.64)                         | .395            |
| <i>Believes in what they are told</i>                                  | 93 (65.95)                      | 99 (58.32)                          | .163            |
| <i>Has sought information</i>                                          | 127 (90.07)                     | 141 (82.94)                         | *.005           |
| <i>Knows the correct symptoms</i>                                      | 134 (95.03)                     | 161 (94.7)                          | .896            |
| <i>Someone close to them has had symptoms suggestive of SARS-CoV-2</i> | 54 (38.29)                      | 55 (32.35)                          | .308            |
| <i>Knows people or relatives who do not believe in the disease</i>     | 120 (81.1)                      | 135 (79.41)                         | .121            |
| <i>Will get vaccinated</i>                                             | 136 (96.45)                     | 156 (91.76)                         | .086            |
| <i>Believes that vaccination must be obligatory</i>                    | 123 (87.23)                     | 141 (82.94)                         | .293            |
| <i>Has sought alternative medicine</i>                                 | 10 (7.09)                       | 25 (14.7)                           | *.009           |

|                                                                    |             |            |         |
|--------------------------------------------------------------------|-------------|------------|---------|
| <i>Knows a medical health provider that has been discriminated</i> | 101 (71.63) | 88 (51.76) | *.<.001 |
| <i>Has complied with quarantine guidelines</i>                     | 85 (60.28)  | 89 (52.35) | .161    |
| <i>Considers quarantine necessary</i>                              | 136 (96.45) | 144 (84.7) | *.001   |
| <i>Their family has complied with quarantine guidelines</i>        | 56 (39.71)  | 73 (42.94) | .081    |
| <i>Do you consider quarantine necessary?</i>                       |             |            | .236    |
| Right now                                                          | 3 (2.12)    | 4 (2.35)   |         |
| During the beginning of June                                       | 8 (5.67)    | 22 (12.94) |         |
| August                                                             | 47 (33.33)  | 59 (34.7)  |         |
| Before 2021                                                        | 44 (31.2)   | 46 (27.05) |         |
| Next year                                                          | 39 (27.65)  | 39 (22.94) |         |
| <i>Do you think quarantine has affected you in any way?</i>        |             |            | <.001   |
| Minimum                                                            | 3 (2.12)    | 8 (4.7)    |         |
| Mild                                                               | 12 (8.51)   | 53 (31.17) |         |
| Moderate                                                           | 55 (39)     | 61 (35.88) |         |
| A lot                                                              | 35 (24.82)  | 0 (0)      |         |

|                                                          |            |             |        |
|----------------------------------------------------------|------------|-------------|--------|
| Exaggerated                                              | 36 (25.53) | 48 (28.23)  |        |
| <i>How do you consider it has affected?</i>              |            |             | .162   |
| Loss of personal projects                                | 3 (2.12)   | 15 (8.82)   |        |
| Depressed mood                                           | 7 (4.96)   | 11 (6.47)   |        |
| Anxious mood                                             | 25 (17.73) | 27 (15.88)  |        |
| Economically                                             | 39 (27.63) | 41 (24.11)  |        |
| Physically                                               | 26 (18.43) | 39 (22.94)  |        |
| Religiously                                              | 28 (19.85) | 23 (13.52)  |        |
| Familiarly                                               | 9 (6.38)   | 8 (4.7)     |        |
| Socially                                                 | 4 (2.83)   | 3 (1.76)    |        |
| <i>Do you think quarantine has affected your family?</i> |            |             | .806   |
| Yes, all of them                                         | 80 (56.73) | 102 (60)    |        |
| No                                                       | 7 (4.96)   | 9 (5.29)    |        |
| Some of them                                             | 54 (38.29) | 59 (34.7)   |        |
| <i>Quarantine triggered intrafamilial violence</i>       |            |             | *<.001 |
| Yes                                                      | 35 (24.82) | 49 (28.82)  |        |
| No                                                       | 83 (58.86) | 121 (71.17) |        |
| Partially                                                | 23 (16.31) | 0           |        |
| <i>Who is the violent one in the family?</i>             |            |             |        |
| Father                                                   | 26 (18.43) | 27 (15.88)  | *.048  |
| Mother                                                   | 18 (12.76) | 17 (10)     | .911   |

|                                                                       |             |             |       |
|-----------------------------------------------------------------------|-------------|-------------|-------|
| Brother                                                               | 23 (16.31)  | 15 (8.82)   | .360  |
| Themselves                                                            | 17 (12.05)  | 19 (11.17)  | .312  |
| Other                                                                 | 12 (8.51)   | 5 (2.94)    | .149  |
| <i>To what degree do you think quarantine increases your anxiety?</i> |             |             | .705  |
| Minimum                                                               | 5 (3.54)    | 12 (7.05)   |       |
| Mild                                                                  | 11 (7.8)    | 14 (8.23)   |       |
| Moderate                                                              | 32 (22.69)  | 38 (22.35)  |       |
| A lot                                                                 | 52 (36.87)  | 62 (36.47)  |       |
| Exaggerated                                                           | 41 (29.07)  | 43 (25.29)  |       |
| <i>Previously diagnosed psychiatric disorder</i>                      | 62 (43.97)  | 64 (37.64)  | .258  |
| Depression                                                            | 38 (26.95)  | 34 (20)     | .130  |
| Anxiety                                                               | 48 (34.04)  | 46 (27.05)  | .216  |
| Bipolar disorder                                                      | 2 (1.41)    | 1 (0.58)    | .584  |
| Other                                                                 | 14 (9.92)   | 19 (11.17)  | .792  |
| <i>Has the previous psychiatric diagnosis worsened?</i>               | 72 (51.06)  | 105 (61.76) | *.018 |
| <i>Residence area</i>                                                 |             |             |       |
| Urban                                                                 | 128 (90.78) | 148 (87.05) | .5    |
| Urban/rural                                                           | 11 (7.8)    | 20 (11.76)  |       |
| Rural                                                                 | 2 (1.41)    | 2 (1.17)    |       |



|                                                                                              |             |             |        |
|----------------------------------------------------------------------------------------------|-------------|-------------|--------|
| Outside the metropolitan area of the University                                              | 29 (20.56)  | 28 (16.47)  | .365   |
| <i>Currently living with their parents</i>                                                   | 118 (83.68) | 155 (91.17) | *<.001 |
| <i>Considers that the economic income is enough</i>                                          | 89 (63.12)  | 96 (56.47)  | .234   |
| <i>Refers to belonging to a risk group</i>                                                   | 21 (14.89)  | 22 (12.94)  | .619   |
| <i>Feels that belonging to a risk group, makes vulnerable your situation in crisis times</i> | 20 (14.18)  | 20 (11.76)  | *.028  |
| <i>Has tried drugs to deal with quarantine</i>                                               | 21 (14.89)  | 15 (8.82)   | .096   |
| <i>Which drugs have they taken?</i>                                                          |             |             | *.001  |
| Cocaine                                                                                      | 0           | 1 (0.58)    |        |
| Marihuana                                                                                    | 11 (7.8)    | 13 (7.64)   |        |
| LSD                                                                                          | 0 (0)       | 0           |        |
| Crack                                                                                        | 0           | 1 (0.58)    |        |
| Opiates                                                                                      | 0           | 4 (2.35)    |        |
| Other                                                                                        | 10 (7.09)   | 0           |        |
| <i>How often?</i>                                                                            |             |             | .230   |
| 1-2 times a week                                                                             | 3 (2.12)    | 6 (3.52)    |        |
| 3-4 times a week                                                                             | 3 (2.12)    | 4 (2.35)    |        |

|                                 |             |             |        |
|---------------------------------|-------------|-------------|--------|
| 5-7 times a week                | 6 (4.25)    | 1 (0.58)    |        |
| Once                            | 14 (9.92)   | 7 (4.11)    |        |
| Would you like to receive help? | 111 (78.72) | 128 (75.29) | .337   |
| Suicidal thoughts               | 61 (43.26)  | 80 (47.05)  | *<.001 |
| Significative PHQ-9 score       | 124 (87.94) | 149 (87.64) | .937   |

GAD-7: General Anxiety Disorder-7; PHQ-9: Patient Health Questionnaire-9.

\**P*-value with statistical significance.

The non-parametric quantitative variables were addressed with the Mann-Whitney U statistical test and the qualitative variables were addressed using the  $\chi^2$  test or Fisher's exact test.

**Table 3 of the supplementary material – Correlation of variables with  
significant depression or anxiety symptomatology staging**

|                                                                              | Significative PHQ-9                   |                    | Significative GAD-7                   |                    |
|------------------------------------------------------------------------------|---------------------------------------|--------------------|---------------------------------------|--------------------|
|                                                                              | Correlation ( <i>R</i><br>or $\rho$ ) | <i>P</i>           | Correlation ( <i>R</i><br>or $\rho$ ) | <i>P</i>           |
| <b>All college students</b>                                                  |                                       |                    |                                       |                    |
| <i>Age</i>                                                                   | .088                                  | <sup>a</sup> .003  | .099                                  | <sup>a</sup> .001  |
| <i>Male gender</i>                                                           | −.085                                 | <sup>a</sup> .004  | −.145                                 | <sup>a</sup> <.001 |
| <i>Reports been informed about<br/>COVID-19</i>                              | −.037                                 | .206               | .021                                  | .473               |
| <i>Believes in available<br/>information about COVID-19</i>                  | −.055                                 | .062               | −.052                                 | .077               |
| <i>Has sought information</i>                                                | −.042                                 | .154               | −.01                                  | .726               |
| <i>Know the correct symptoms</i>                                             | −.016                                 | .581               | −.039                                 | .191               |
| <i>Someone close to them has<br/>had suggestive symptoms of<br/>COVID-19</i> | .109                                  | <sup>a</sup> <.001 | .018                                  | .538               |
| <i>Knows people or relatives who<br/>doesn't believe in COVID-19</i>         | .038                                  | .199               | .039                                  | .192               |
| <i>Will get vaccinated when a<br/>vaccine is available</i>                   | .022                                  | .458               | .039                                  | .186               |
| <i>Believes vaccination must be<br/>mandatory</i>                            | .044                                  | .137               | .077                                  | <sup>a</sup> .009  |
| <i>Has sought alternative<br/>medicine</i>                                   | .035                                  | .262               | .047                                  | .112               |
| <i>Knows a health provider that<br/>has been discriminated</i>               | .081                                  | <sup>a</sup> .006  | .135                                  | <sup>a</sup> <.001 |
| <i>Has complied with quarantine<br/>guidelines</i>                           | −.044                                 | .132               | .053                                  | .070               |

|                                                                                           |       |                    |       |                    |
|-------------------------------------------------------------------------------------------|-------|--------------------|-------|--------------------|
| <i>Believes that the quarantine has minimally affected them</i>                           | -.277 | <sup>a</sup> <.001 | -.263 | <sup>a</sup> <.001 |
| <i>Their family has complied with quarantine guidelines</i>                               | .073  | <sup>a</sup> .014  | -.045 | .128               |
| <i>Believes that quarantine has affected their family</i>                                 | .113  | <sup>a</sup> <.001 | .130  | <sup>a</sup> <.001 |
| <i>Quarantine triggered intrafamilial violence</i>                                        | .073  | <sup>a</sup> .013  | .113  | <sup>a</sup> <.001 |
| <i>Who is the violent one in the family?</i>                                              |       |                    |       |                    |
| Father                                                                                    | .019  | .757               | .057  | .344               |
| Mother                                                                                    | .103  | .085               | -.071 | .237               |
| Siblings                                                                                  | -.087 | .145               | .035  | .558               |
| Themselves                                                                                | .087  | .146               | .107  | .073               |
| Other                                                                                     | -.095 | .114               | -.064 | .282               |
| <i>Previously diagnosed psychiatric disorder</i>                                          | .216  | <sup>a</sup> <.001 | .229  | <sup>a</sup> <.001 |
| Depression                                                                                | .165  | <sup>a</sup> .007  | .085  | .168               |
| Anxiety                                                                                   | -.036 | .558               | .052  | .391               |
| Bipolar disorder                                                                          | .097  | .123               | -.077 | .222               |
| Other                                                                                     | .045  | .277               | .075  | .231               |
| <i>Lives in an urban area</i>                                                             | .022  | .453               | .024  | .410               |
| <i>Foreign student</i>                                                                    | .066  | <sup>a</sup> .025  | .005  | .875               |
| <i>Currently living with their parents</i>                                                | -.018 | .535               | .010  | .726               |
| <i>Consider having a sufficient economic income</i>                                       | -.160 | <sup>a</sup> <.001 | -.099 | <sup>a</sup> .001  |
| <i>Belong to a risk group</i>                                                             | .046  | .122               | .086  | <sup>a</sup> .004  |
| <i>Feeling that belonging to a risk group violates their situation in times of crisis</i> | .069  | .405               | .88   | .290               |

|                                                                      |       |                    |       |                    |
|----------------------------------------------------------------------|-------|--------------------|-------|--------------------|
| <i>Have tried any drugs to deal with quarantine</i>                  | .086  | <sup>a</sup> .004  | .092  | <sup>a</sup> .002  |
| <i>Suicide thoughts</i>                                              | .448  | <sup>a</sup> <.001 | .352  | <sup>a</sup> <.001 |
| <i>Significative GAD-7 or PHQ-9 score</i>                            | .497  | <sup>a</sup> <.001 | .497  | <sup>a</sup> <.001 |
| <b>Health-related students</b>                                       |       |                    |       |                    |
| <i>Age</i>                                                           | .141  | <sup>a</sup> .001  | .089  | <sup>a</sup> .035  |
| <i>Male gender</i>                                                   | -.098 | <sup>a</sup> .021  | -.158 | <sup>a</sup> <.001 |
| <i>Reports been informed about COVID-19</i>                          | -.058 | .174               | .021  | .626               |
| <i>Believes in available information about COVID-19</i>              | -.042 | .329               | -.045 | .292               |
| <i>Has sought information</i>                                        | -.049 | .253               | -.043 | .308               |
| <i>Know the correct symptoms</i>                                     | -.034 | .424               | -.013 | .765               |
| <i>Someone close to them has had suggestive symptoms of COVID-19</i> | .111  | <sup>a</sup> .009  | .018  | .675               |
| <i>Knows people or relatives who doesn't believe in COVID-19</i>     | .012  | .774               | .024  | .576               |
| <i>Will get vaccinated when a vaccine is available</i>               | .011  | .792               | .052  | .221               |
| <i>Believes vaccination must be mandatory</i>                        | .085  | <sup>a</sup> .045  | .073  | .086               |
| <i>Has sought alternative medicine</i>                               | .022  | .612               | .028  | .51                |
| <i>Knows a health provider that has been discriminated</i>           | .061  | .154               | .140  | <sup>a</sup> .001  |
| <i>Has complied with quarantine guidelines</i>                       | -.061 | .15                | -.042 | .327               |
| <i>Their family has complied with quarantine guidelines</i>          | -.109 | <sup>a</sup> .01   | -.089 | <sup>a</sup> .036  |

|                                                                                           |       |                    |       |                    |
|-------------------------------------------------------------------------------------------|-------|--------------------|-------|--------------------|
| <i>Believes that quarantine has minimally affected them</i>                               | -.331 | <sup>a</sup> <.001 | -.339 | <sup>a</sup> <.001 |
| <i>Believes that quarantine has affected their family</i>                                 | .076  | .072               | .094  | <sup>a</sup> .027  |
| <i>Quarantine triggered intrafamilial violence</i>                                        | .011  | .802               | .064  | .130               |
| <i>Who is the violent one in the family?</i>                                              |       |                    |       |                    |
| Father                                                                                    | .143  | .067               | .064  | .410               |
| Mother                                                                                    | .143  | .067               | -.097 | .214               |
| Siblings                                                                                  | -.153 | <sup>a</sup> .048  | .006  | .940               |
| Themselves                                                                                | .094  | .227               | .159  | <sup>a</sup> .04   |
| Other                                                                                     | -.203 | <sup>a</sup> .009  | -.082 | .294               |
| <i>Previously diagnosed psychiatric disorder</i>                                          | .226  | <sup>a</sup> <.001 | .234  | <sup>a</sup> <.001 |
| Depression                                                                                | .178  | <sup>a</sup> .042  | .108  | .217               |
| Anxiety                                                                                   | .037  | .669               | .133  | .119               |
| Bipolar disorder                                                                          | -.079 | .391               | -.095 | .304               |
| Other                                                                                     | -.039 | .674               | .003  | .970               |
| <i>Lives in an urban area</i>                                                             | .042  | .322               | .071  | .094               |
| <i>Foreign student</i>                                                                    | .063  | .139               | -.002 | .954               |
| <i>Currently living with their parents</i>                                                | -.060 | .162               | -.020 | .640               |
| <i>Consider having a sufficient economic income</i>                                       | -.183 | <sup>a</sup> <.001 | -.086 | <sup>a</sup> .044  |
| <i>Belong to a risk group</i>                                                             | .033  | .445               | .097  | <sup>a</sup> .022  |
| <i>Feeling that belonging to a risk group violates their situation in times of crisis</i> | .014  | .893               | .011  | .914               |
| <i>Have tried any drugs to deal with quarantine</i>                                       | .132  | <sup>a</sup> .002  | .186  | <sup>a</sup> <.001 |

|                                                                      |       |                    |       |                    |
|----------------------------------------------------------------------|-------|--------------------|-------|--------------------|
| <i>Suicide thoughts</i>                                              | .446  | <sup>a</sup> <.001 | .355  | <sup>a</sup> <.001 |
| <i>Significative GAD-7 or PHQ-9 score</i>                            | .514  | <sup>a</sup> <.001 | .514  | <sup>a</sup> <.001 |
| <b>Non-health-related students</b>                                   |       |                    |       |                    |
| <i>Age</i>                                                           | .032  | .442               | .099  | <sup>a</sup> .016  |
| <i>Male gender</i>                                                   | .079  | <sup>b</sup> .053  | -.138 | <sup>a</sup> .001  |
| <i>Reports been informed about COVID-19</i>                          | .015  | .722               | .025  | .545               |
| <i>Believes in available information about COVID-19</i>              | -.054 | .190               | .059  | .148               |
| <i>Has sought information</i>                                        | -.024 | .558               | .018  | .659               |
| <i>Know the correct symptoms</i>                                     | -.001 | .982               | -.068 | .098               |
| <i>Someone close to them has had suggestive symptoms of COVID-19</i> | .114  | <sup>a</sup> .005  | .023  | .554               |
| <i>Knows people or relatives who doesn't believe in COVID-19</i>     | .070  | .088               | .057  | .164               |
| <i>Will get vaccinated when a vaccine is available</i>               | .038  | .359               | .036  | .387               |
| <i>Believes vaccination must be mandatory</i>                        | .016  | .690               | .85   | <sup>a</sup> .037  |
| <i>Has sought alternative medicine</i>                               | .038  | .354               | .058  | .159               |
| <i>Knows a health provider that has been discriminated</i>           | .124  | <sup>a</sup> .002  | .150  | <sup>a</sup> <.001 |
| <i>Has complied with quarantine guidelines</i>                       | -.038 | .351               | .042  | .310               |
| <i>Their family has complied with quarantine guidelines</i>          | .035  | .395               | -.002 | .961               |

|                                                                                           |       |                    |       |                    |
|-------------------------------------------------------------------------------------------|-------|--------------------|-------|--------------------|
| <i>Believes that quarantine has minimally affected them</i>                               | -.249 | <sup>a</sup> <.001 | -.201 | <sup>a</sup> <.001 |
| <i>Believes that quarantine has affected their family</i>                                 | .148  | <sup>a</sup> <.001 | .164  | <sup>a</sup> <.001 |
| <i>Quarantine triggered intrafamilial violence</i>                                        | .127  | <sup>a</sup> .002  | .159  | <sup>a</sup> <.001 |
| <i>Who is the violent one in the family?</i>                                              |       |                    |       |                    |
| Father                                                                                    | -.165 | .081               | .034  | .724               |
| Mother                                                                                    | .042  | .658               | -.036 | .702               |
| Siblings                                                                                  | .056  | .557               | .112  | .237               |
| Themselves                                                                                | .081  | .389               | .036  | .704               |
| Other                                                                                     | .188  | <sup>a</sup> .045  | .011  | .912               |
| <i>Previously diagnosed psychiatric disorder</i>                                          | .212  | <sup>a</sup> <.001 | .229  | <sup>a</sup> <.001 |
| Depression                                                                                | .168  | <sup>b</sup> .052  | .074  | .395               |
| Anxiety                                                                                   | -.110 | .205               | -.027 | .755               |
| Bipolar disorder                                                                          | -.118 | .173               | -.044 | .616               |
| Other                                                                                     | .134  | .123               | .149  | .087               |
| <i>Refers that his psychiatric disorder has worsened</i>                                  | .246  | <sup>a</sup> .003  | .286  | <sup>a</sup> .001  |
| <i>Lives in an urban area</i>                                                             | .0    | 1                  | -.022 | .593               |
| <i>Foreign student</i>                                                                    | .065  | .114               | .008  | .836               |
| <i>Currently living with their parents</i>                                                | .020  | .627               | .039  | .337               |
| <i>Consider having a sufficient economic income</i>                                       | -.134 | <sup>a</sup> .001  | -.107 | <sup>a</sup> .009  |
| <i>Belong to a risk group</i>                                                             | .059  | .149               | .076  | .062               |
| <i>Feeling that belonging to a risk group violates their situation in times of crisis</i> | .135  | .320               | .214  | .114               |



|                                                     |      |                    |      |                    |
|-----------------------------------------------------|------|--------------------|------|--------------------|
| <i>Have tried any drugs to deal with quarantine</i> | .044 | .281               | .014 | .742               |
| <i>Suicide thoughts</i>                             | .322 | <sup>a</sup> <.001 | .309 | <sup>a</sup> <.001 |
| <i>GAD-7 or PHQ-9 Higher or equal than 10</i>       | .583 | <sup>a</sup> <.001 | .583 | <sup>a</sup> <.001 |

GAD-7: General Anxiety Disorder-7; PHQ-9: Patient Health Questionnaire-9.

<sup>a</sup>Significant *P*-value.

<sup>b</sup>Almost significant *P*-value.

The nonparametric variables have been correlated with the Spearman correlation.
